# Supplementary material
Source: PubMed Central journal article supplement (PMC1237146)
Supplement: bj3910125add.pdf [file bj3910125add.pdf]

# **SUPPLEMENTARY DATA**

for

## **Oxidation of heparan sulfate by hypochlorite: role of *N*-chloro derivatives and dichloramine-dependent fragmentation**

Martin D. REES, David I. PATTISON and Michael J. DAVIES<sup>1</sup>

Free Radical Group, Heart Research Institute, Camperdown, Sydney, NSW 2050, Australia

Running title: HOCl-induced damage to heparan sulfate

Correspondence to: Prof. Michael Davies, The Heart Research Institute, 145 Missenden Road, Camperdown, Sydney, NSW 2050, Australia.

Tel: +61 2 9550 3560

Fax: +61 2 9550 3302

Email: [m.davies@hri.org.au](mailto:m.davies@hri.org.au)

**Supplementary Data Table 1: Parameters used for modelling the reaction of HOCl with proteoglycans**

|                        | Component                       | Glypican-1 <sup>a</sup> | Perlecan <sup>a</sup> | $k_2$ (22°C) M <sup>-1</sup> s <sup>-1</sup> <sup>b</sup> |
|------------------------|---------------------------------|-------------------------|-----------------------|-----------------------------------------------------------|
| <i>Core protein</i>    | Met                             | 10                      | 41                    | $3.8 \times 10^7$                                         |
|                        | Cys                             | 2                       | 84                    | $3.0 \times 10^7$                                         |
|                        | Cystine                         | 7                       | 52                    | $1.6 \times 10^5$                                         |
|                        | His                             | 9                       | 165                   | $1.0 \times 10^5$                                         |
|                        | Lys                             | 20                      | 68                    | $5.0 \times 10^3$                                         |
|                        | Trp                             | 6                       | 40                    | $1.1 \times 10^4$                                         |
|                        | Tyr                             | 11                      | 109                   | 44                                                        |
|                        | Arg                             | 41                      | 258                   | 26                                                        |
|                        | Asn                             | 19                      | 107                   | 0.03                                                      |
|                        | Glc                             | 26                      | 254                   | 0.03                                                      |
|                        | Terminal amine                  | 1                       | 1                     | $1.0 \times 10^5$                                         |
| Backbone amide         | 506                             | 4369                    | 0.11                  |                                                           |
| <i>Heparan sulfate</i> | GlcNAc                          | 171                     | 171                   | 0.0108                                                    |
| <i>chains</i>          | GlcNSO <sub>3</sub>             | 117                     | 117                   | 0.062                                                     |
|                        | GlcNH <sub>2</sub>              | 12                      | 12                    | $7.6 \times 10^5$                                         |
|                        | (GlcNH <sub>2</sub> chloramine) | (0)                     | (0)                   | 14                                                        |

<sup>a</sup> Abundance data derived as detailed in the Experimental section. <sup>b</sup> Second-order rate constants for reaction with proteoglycan components are those previously reported for protein components [17] and those reported here for glycosaminoglycan components, as detailed in the Experimental section.

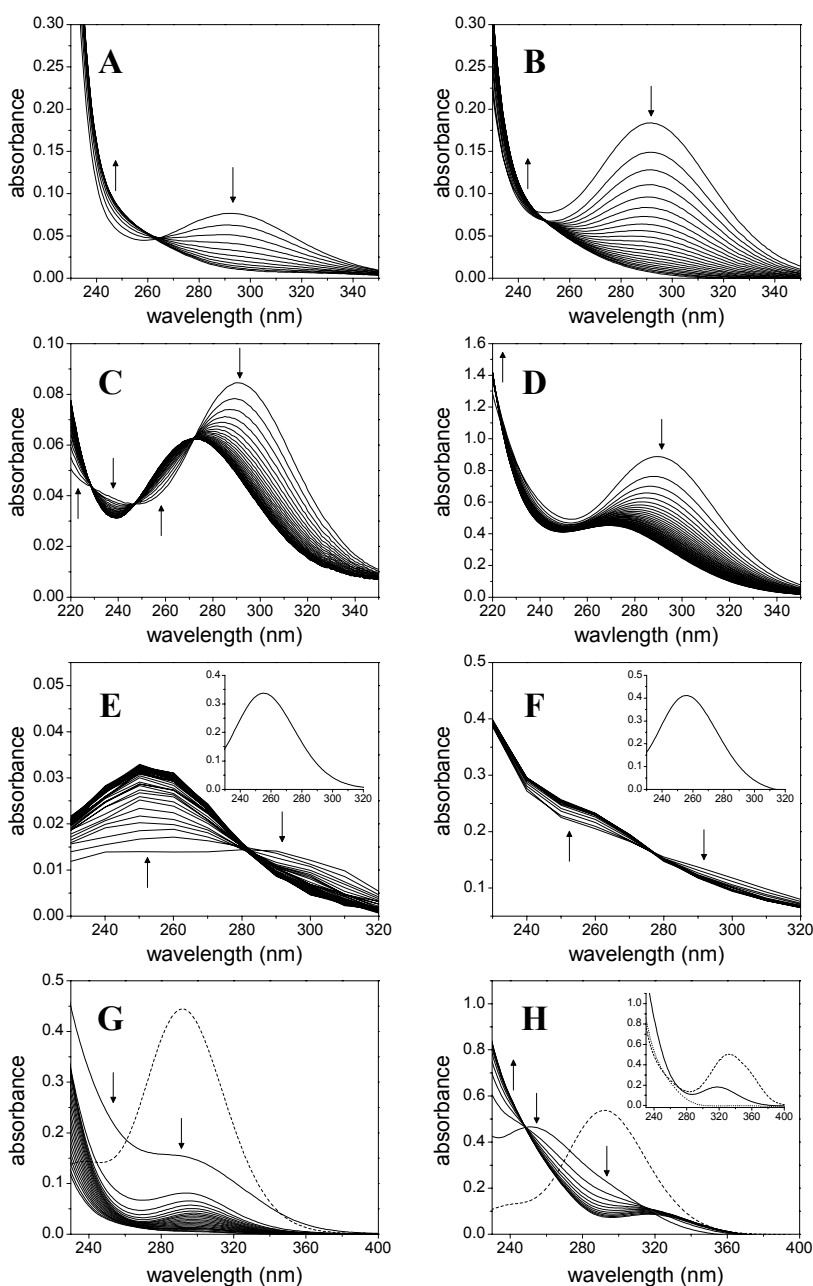

**Supplementary Data Figure 1: UV-vis spectroscopy data for reaction of HOCl with glycosamine monosaccharides and glycosaminoglycans at pH 7.4. (A)** Formation of GlcNAc chloramides on reaction of GlcNAc (20 mM) with HOCl (0.5 mM) at 37 °C; spectra recorded from  $t = 0.5 - 41.75$  min at 3.75 min intervals. **(B)** Formation of polymer-derived GlcNAc chloramides on reaction of HA (8.08 mg ml<sup>-1</sup>; 20 mM GlcNAc residues) with HOCl (1 mM) at 37 °C; spectra recorded from  $t = 0.5 - 900.5$  min at 5 min intervals. **(C)** Formation of GlcNSO<sub>3</sub>

*N*-chlorosulfonamides on reaction of GlcNSO<sub>3</sub> (2.5 mM) with HOCl (0.5 mM) at 22 °C, spectra recorded from  $t = 0.5 - 12.5$  min at 0.75 min intervals. **(D)** Formation of polymer-derived GlcNSO<sub>3</sub> *N*-chlorosulfonamides on reaction of *b*-HP (6.4 mg ml<sup>-1</sup>; 9.67 mM GlcNSO<sub>3</sub>, 0.23 mM GlcNAc) with HOCl (5 mM) at 37 °C; spectra recorded from  $t = 0.5 - 180.5$  min at 5 min intervals. **(E)** Formation of GlcNH<sub>2</sub> chloramines on reaction of GlcNH<sub>2</sub> (0.25 mM) with HOCl (0.1 mM) at 9.5 °C spectra recorded from  $t = 2.5$  ms – 100.5 ms at 2 ms intervals. Inset: spectrum of GlcNH<sub>2</sub> (1 mM) with HOCl (1 mM) at 22 °C after  $t = 0.5$  min. **(F)** Formation of polymer-derived GlcNH<sub>2</sub> chloramines on reaction of *dnsp*-HP (6.4 mg ml<sup>-1</sup>; 1.32 mM GlcNH<sub>2</sub> residues) with HOCl (0.2 mM) at 10 °C; spectra recorded from  $t = 2.5 - 62.5$  ms at 5 ms intervals. Inset: difference spectrum obtained by subtracting the spectrum of *dnsp*-HP alone (6.4 mg ml<sup>-1</sup>) from the spectrum of *dnsp*-HP (6.4 mg ml<sup>-1</sup>; 1.32 mM GlcNH<sub>2</sub> residues) after reaction with HOCl (1.32 mM) at 22 °C for  $t = 0.5$  min. **(G)** Formation, and subsequent decomposition, of GlcNH<sub>2</sub> dichloramines formed on reaction of GlcNH<sub>2</sub> (1 mM) with HOCl (2.5 mM) at 22 °C spectra recorded from  $t = 0.5 - 45.5$  min at 2.25 min intervals. Spectrum indicated by dashed line is HOCl alone (2.5 mM). **(H)** Formation of polymer-derived GlcNH<sub>2</sub> dichloramines and subsequent decomposition products. Difference spectra obtained by subtracting the spectrum of *dnsp*-HP alone (6.4 mg ml<sup>-1</sup>) from spectra of *dnsp*-HP (6.4 mg ml<sup>-1</sup>; 1.32 mM GlcNH<sub>2</sub> residues) treated with HOCl (2.64 mM) at 37 °C spectra recorded from  $t = 0.5 - 20.5$  min at 2 min intervals. Spectrum indicated by dashed line is HOCl alone (2.64 mM). Inset: difference spectra obtained by subtracting the spectrum of *dnsp*-HP alone (6.4 mg ml<sup>-1</sup>) from *dnsp*-HP (6.4 mg ml<sup>-1</sup>; 1.815 mM GlcNH<sub>2</sub> residues) treated with HOCl (3.63 mM) at 37 °C, with spectra recorded at 0.75 h (solid line), 6 h (dotted line) and 24 h (dashed line). In each case arrows indicate direction of changes in spectral intensity over time.
